# Supplementary material for: Establishing Mixotrophic Growth of Cupriavidus necator H16 on CO2 and Volatile Fatty Acids
Source: MDPI journal article supplement (doi:10.3390/fermentation8030125), 2022-03-14
Supplement: s1 [file s1]

### Supplementary data

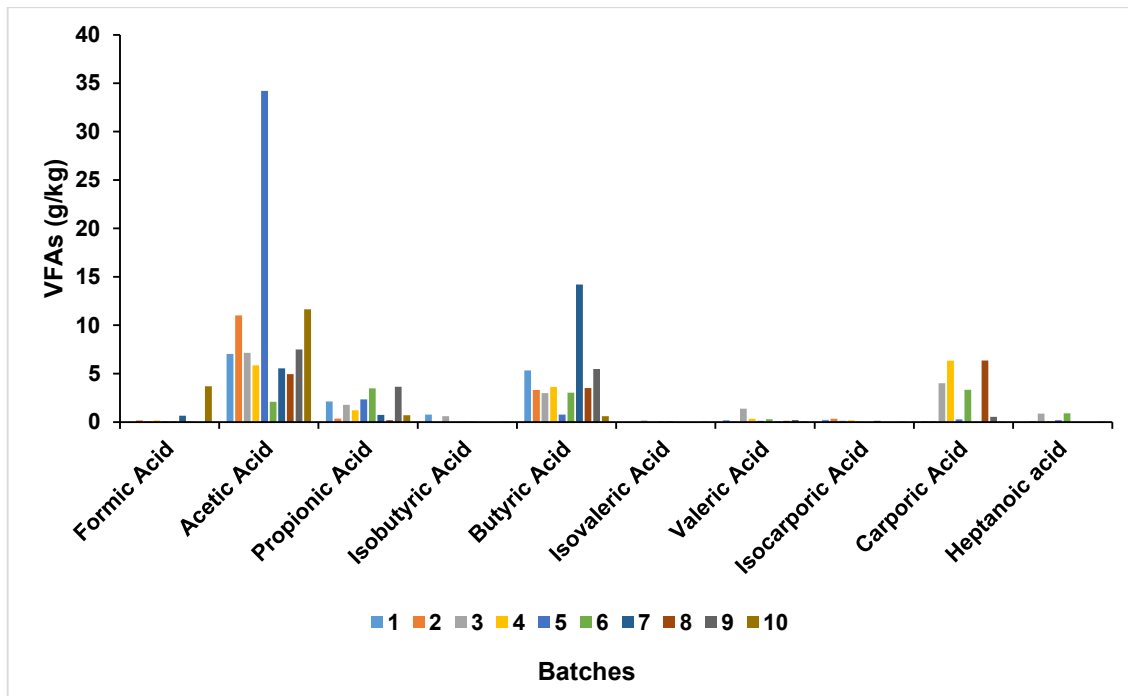

**Figure S1.** Composition of VFAs from 10 different batches of AD digestate provided by ACEA.

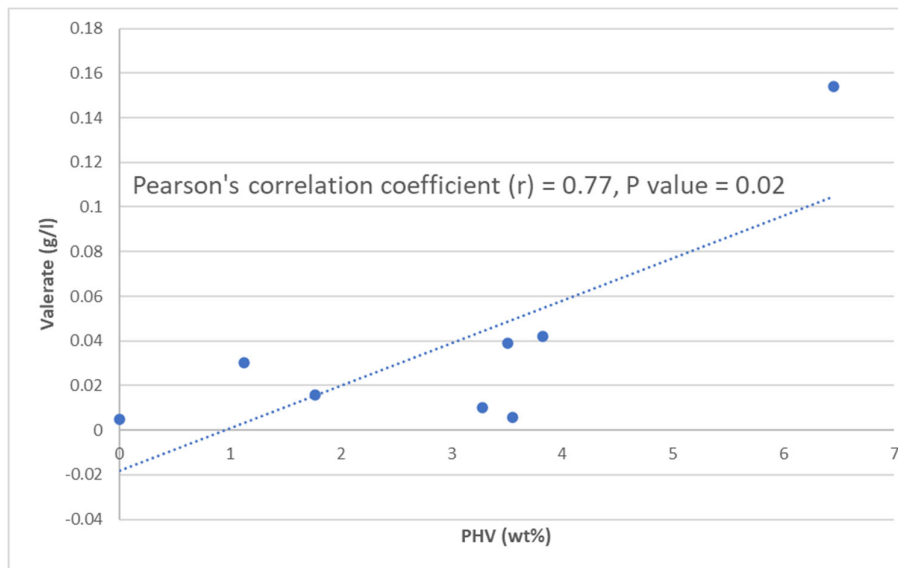

**Figure S2.** Pearson correlation analysis showing the relationship between PHV content (wt%) and valerate concentration (g/l) from different batches of anaerobic digest provided by ACEA. Only 8 batches were considered for this analysis due to the lack of valeric acid in two of the batches. .
